# Supplementary material
Source: Springer Nature journal article supplement (https://www.springermedizin.de/resource/supplementary/13256_2009_1235_MOESM2_ESM.pdf/9647302)

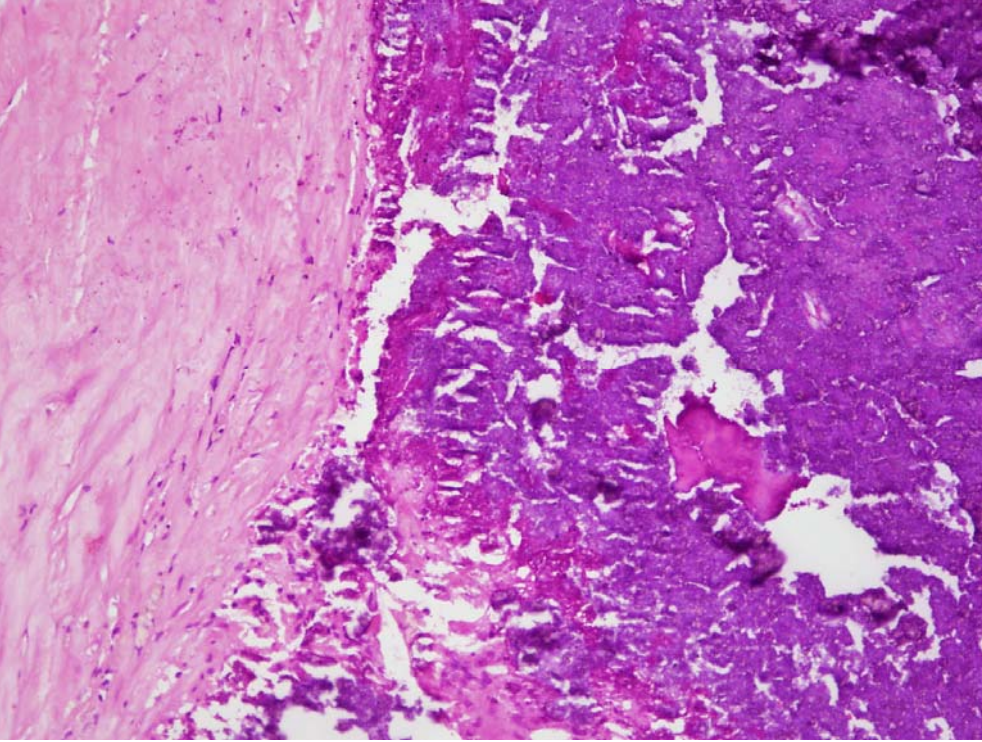

Supplement: MOESM2 [file 9647302]
